## **Sex-dimorphic regulation of extracellular matrix genes in mouse bone marrow neutrophils**

Cassandra J. McGill<sup>1</sup>, Collin Y. Ewald<sup>2, §</sup> and Bérénice A. Benayoun<sup>1,3,4,5,6,§</sup>

<sup>1</sup>Leonard Davis School of Gerontology, University of Southern California, Los Angeles, CA 90089, USA.

<sup>2</sup> Laboratory of Extracellular Matrix Regeneration, Institute of Translational Medicine, Department of Health Sciences and Technology, Swiss Federal Institute of Technology (ETH Zürich), Schwerzenbach, Switzerland.

<sup>3</sup> Molecular and Computational Biology Department, USC Dornsife College of Letters, Arts and Sciences, Los Angeles, CA 90089, USA.

<sup>4</sup> Biochemistry and Molecular Medicine Department, USC Keck School of Medicine, Los Angeles, CA 90089, USA.

<sup>5</sup> USC Norris Comprehensive Cancer Center, Epigenetics and Gene Regulation, Los Angeles, CA 90089, USA.

<sup>6</sup> USC Stem Cell Initiative, Los Angeles, CA 90089, USA.

<sup>§</sup>co-corresponding authors

## Abstract

The mammalian innate immune system is sex-dimorphic. Neutrophils are the most abundant leukocyte in humans and represent innate immunity's first line of defense. We previously found that primary mouse bone marrow neutrophils show widespread sex-dimorphism throughout life, including at the transcriptional level. Extracellular matrix [ECM]-related terms were observed among the top sex-dimorphic genes. Since the ECM is emerging as an important regulator of innate immune responses, we sought to further investigate the transcriptomic profile of primary mouse bone marrow neutrophils at both the bulk and single-cell level to understand how biological sex may influence ECM component expression in neutrophils throughout life. Here, using curated gene lists of ECM components and unbiased weighted gene co-expression network analysis [WGCNA], we find that multiple ECM-related gene sets show widespread female-bias in expression in primary mouse neutrophils. Since many immune-related diseases (e.g., rheumatoid arthritis) are more prevalent in females, our work may provide insights into the pathogenesis of sex-dimorphic inflammatory diseases.

## Introduction

Accumulating evidence shows that, even outside of reproductive organs, mammalian biology is very sex-dimorphic [1]. Indeed, the mammalian immune system shows broad differences between males vs. females, including aspects of innate and adaptive immune responses [2-4]. Generally, a more robust immune response is observed in females, which may underlie a higher auto-immunity risk, whereas an increased susceptibility to infection and a worse response to sepsis is found in males [2].

Neutrophils are the most abundant cell type in human blood, representing 50-70% of leukocytes in humans throughout life [5]. They are a type of “granulocytes”, produced in the bone marrow and released into circulation for immune surveillance, representing a first line-of-defense against infections [6, 7]. Neutrophils perform key immune functions, including the production/release of antimicrobial granules and of “Neutrophil Extracellular Traps” [NETs] [6, 8], composed of extruded chromatin, proteases, and antimicrobial peptides. While neutrophils defend against infections, their aberrant activation aggravates pathological inflammation [6, 7, 9]. They can also drive inflammatory disease, leading to tissue damage [8, 10].

Recent work by our group revealed widespread sex-dimorphism in the transcriptome of primary murine bone marrow neutrophils throughout life (4 to 20 months of age) [11]. Consistently, transcriptomic data by the ImmGen Consortium showed clear differences between the neutrophils of young prepubertal female vs. male mice (6 weeks of age) [4]. Importantly, we also recently reported that sex-differences in primary bone marrow neutrophils are found at every stage of underlying heterogeneity using single-cell RNA-seq [12]. In our previous analyses of primary neutrophil transcriptomes, Gene Ontology [GO] terms related to collagen synthesis and extracellular matrix [ECM] biology were observed in the top listed GO terms with significant sex-dimorphic gene expression at the bulk RNA-seq level [11]. Furthermore, beyond the transcriptional level, accumulating evidence supports the idea that the functional landscape of neutrophils differs between sexes throughout life, with male-bias in the production of primary granule protein neutrophil elastase [ELANE] [11], a serine protease that can break down elastin and collagens [13], potentially remodels the ECM.

Intriguingly, ECM components are emerging as potent regulatory mediators of innate immune responses [14]. The importance of the extracellular matrix in neutrophil recruitment and function is becoming more evident based on recent studies [15]. Indeed, recent work suggests that neutrophils can transport ECM components to wound sites to help promote healing [16]. Although the production of ECM components by neutrophils themselves has not been explored in depth, emerging evidence suggests that the synthesis of “emergency” ECM containing fibronectins by neutrophils plays an important role in promoting fracture healing [17]. However, sex-differences in the regulation of ECM biology by neutrophils remain poorly understood.

To follow-up on this tantalizing observation of sex-dimorphism in ECM gene expression, we reanalyze transcriptomic data from primary mouse bone marrow neutrophils to help understand how biological sex may influence regulation of ECM component expression. Using expert-curated ECM gene sets (*i.e.*, matrisome), we confirm broad female-bias in the expression of genes related to ECM components and remodeling in young and old female neutrophils in our bulk RNA-seq dataset. To gain a more granular view and determine any underlying heterogeneity of ECM expression of young mice’s neutrophils, we recently generated a single cell RNA-seq data and find again a female-specific enrichment for ECM. In addition, using unbiased weighted gene co-expression network analysis [WGCNA], we identify significant sex-biased gene expression modules in primary neutrophils. Importantly, the top female-biased WGCNA module in neutrophils was significantly enriched for ECM-related genes. Thus, our analyses suggest that female neutrophils may uniquely contribute to tissue repair and ECM remodeling, in addition to their core function in the immune response.

## Results

### *Gene set enrichment analysis confirms female-biased expression of ECM-related genes expression in primary mouse neutrophils*

In our previous study using a multi-omic approach to assess changes in neutrophils based on age and sex, we observed a significant female bias (regardless of age) for expression of genes related to GO terms “Collagen chain trimerization”, “Assembly of collagen fibrils and other multimeric structures”, and “Non-integrin membrane-ECM interactions” [11]. Because of the emerging role of neutrophils in ECM-regulation [15], we decided to investigate further the potential differential regulation of extracellular matrix (ECM) related processes, as a function of organismal aging or biological sex.

To determine whether ECM-related genes are differentially regulated as a function of organismal age or biological sex, we took advantage of 2 datasets that we previously generated: (i) a bulk transcriptomic dataset of primary bone marrow neutrophils derived from young and old, female and male C57BL/6Nia mice [11], and (ii) a single cell transcriptomic dataset of primary bone marrow neutrophils derived from young female and male C57BL/6J mice [12] (**Figure 1A**). In addition, to maximize our understanding of differential regulation of ECM-related genes in neutrophils, we leveraged expert-curated gene sets related to ECM biology (*i.e.*, matrisome; **Supplemental Table S1**). The matrisome encompasses all proteins that form the extracellular matrix (*i.e.*, collagens, ECM glycoproteins, proteoglycans), also referred to as the core matrisome, encompassing 274 genes in mice [18]. Furthermore, the matrisome also includes proteins that either remodel the ECM (*i.e.*, matrix metalloproteases or ECM regulators) or localize into the ECM (*i.e.*, secreted factors, ECM-affiliated genes), collectively referred to as matrisome-associated genes, which are 836 genes in mice [18]. Thus, examining the changes in the composition of these 1,110 matrisome genes might help us reveal some new underlying biology.

First, we leveraged these gene sets to perform Gene Set Enrichment Analysis (GSEA) on bulk transcriptomic neutrophil data to detect potential changes as a function of aging or sex (**Figure 1B**; **Supplemental Table S2**). We observed no significant changes in the expression of ECM-related genes based on organismal age, suggesting

that ECM biology is not disrupted in aging mouse neutrophils (**Supplemental Table S2**). By contrast, we did find robust female bias in the expression of most ECM-related gene sets in neutrophils (**Figure 1B; Supplemental table S2**). In addition to a female-biased enrichment in collagen-encoding genes (**Figure 1B**,  $FDR = 4.26 \times 10^{-9}$ ), we also observed significant female-biased expression for genes related to the core matrisome, ECM affiliated genes, ECM glycoproteins, matrisome-associated genes, and secreted factors, but not for proteoglycan-related genes (**Figure 1B; Supplemental Table S2**). Importantly, when analyzing the overall expression of these genes using a single-cell scoring paradigm in single-cell RNA-seq data, we also observed robust female-bias expression for most of the ECM-related gene sets (**Figure 1C**). Interestingly, based on neutrophil subset definitions from [19], ECM-related genes may be highest in more mature neutrophils, suggesting that this phenotype is acquired during the maturation process (**Figure S1A**). Although collagens were not robustly detected in single-cell RNA-seq due to relatively low expression and lower sensitivity of the technique, collagen genes showed robust female-bias in their expression at the bulk transcriptome level (**Figure 1D, E**). Overall, our analysis determined that genes that both encode structural components of the ECM and remodel the ECM tend to be expressed at higher levels in female neutrophils throughout life, suggesting that the emerging interactions between neutrophil activity and ECM biology may be sex-dimorphic throughout life.

*Weighted gene co-expression network analysis reveals that the top female-biased module is enriched for collagens*

We next asked which gene modules were coregulated together with ECM-related genes in a female-biased fashion by leveraging weighted gene co-expression network analysis [WGCNA] (**Figure S1A, B**). Since WGCNA is optimized to be used on bulk datasets, we focused this analysis on the bulk transcriptomic neutrophil data. After network construction, we identified 13 significant transcriptional modules (**Supplemental Table S3**). We next used the WGCNA module-trait relationship feature to identify which modules were significantly associated with organismal age and/or sex (**Figure 2A**).

Most notably, the most significant sex-associated module, the Salmon module, which contains 318 genes, showed clear female-bias regardless of age (**Figure 2B**). To note, there was no significant enrichment for X-linked genes in the Salmon module ( $p = 0.9153$  in Fisher's exact test), although some X-linked genes were found in this module (*i.e.*, *Xist*, *Tsix*, *Nyx*, *Kdm6a*, *Kdm5c*, *Zxdb*). Manual inspection also revealed that this module contains many collagen genes (**Supplemental Table S3**). By contrast, the module with the second most significant sex-association, the Magenta module, which contains 544 genes, showed male-bias, as well as decreases with aging (**Figure 2B**). To unbiasedly determine which functions were associated with the Salmon and Magenta module, we used hypergeometric enrichment with Gene Ontology and Reactome categories (**Figure 2C, D; Supplemental Table S3**). Consistent with the presence of collagen-related genes, the Salmon module was strongly associated with collagen- and ECM-related terms (**Figure 2C, D; Supplemental Table S3**). By contrast, the Magenta module was strongly associated with chromatin and cell cycle-related terms (**Supplemental Table S3**), consistent with our previous observations that these terms were male-biased and regulated with aging [11]. Together, our analysis of the topmost sex-associated WGCNA modules revealed that ECM gene expression is a sex-dimorphic transcriptional feature of neutrophils.

## Discussion

While neutrophils upon activation are known to secrete elastase and MMPs to remodel ECM [13, 15], activate fibroblasts [20, 21], or even transport ECM to wound sites [16], little is known about intrinsic expression of ECM genes of neutrophils in their bone marrow niche. Here, we show that the most significant gene cluster correlating with biological sex (Salmon cluster) is enriched with a distinct set of ECM genes that are biased to be expressed at higher levels in female neutrophils.

We identified potential gene sets in the Salmon cluster that might prime female neutrophils for improved wound healing (**Supplemental Table S3**). This gene network consists of collagens interacting with platelet-derived growth factor binding (**Figure 2**), known to initiate neutrophil activation and inflammatory responses at sites of injury [22]. Interestingly, integrin  $\alpha 5$  (*Itga5*) was uniquely expressed in the Salmon cluster. Neutrophils that express  $\alpha 5\beta 1$  integrin bind fibronectin [23]. Fibronectin is important for wound healing and is required to be placed first in order to add collagen to build a new functional ECM [24]. In human bone fracture hematomas, neutrophils localize to fibronectin shortly after injury, and hematoma-localized neutrophils are uniquely stained for cellular fibronectin [17]. This suggests that activated neutrophils in the hematoma may produce a first “emergency ECM” [17], consistent with our observation of fibrillar collagen gene expression of neutrophils. Furthermore, upon adhering to fibronectin, neutrophils secrete branched-chain (valine, isoleucine, leucine), aromatic (tyrosine, phenylalanine), and positively charged free amino acids (arginine, ornithine, lysine, hydroxylysine, histidine) [17]. Although the reason for this is unclear, the release of, for instance hydroxylysine, crucial for Lysyl oxidase-mediated collagen crosslinking, is either increased by stimulating neutrophils with insulin or reduced by blocking the PI3K/Akt pathway [17]. Based on this and the composition of the female-enriched Salmon module, we speculate on a connection among this metabolic axis via serum/glucocorticoid regulated kinase 1 (*Sgk1*), integrin  $\alpha 5$ , and fibrillar collagens (*Col1a1/2*, *Col2a1*), integrated stress response activating transcription factor 4 (*Atf4*), also implicated in amino acid metabolism for collagen biosynthesis [25], and potentially modulating immune responses via *Pdgfa* and interleukin 6 receptor alpha (*Il6ra*) and further collagen synthesis fibroblast growth factor receptor 1 (*Fgfr1*) (**Supplemental**



**Table S3).** This hypothesis might be interesting to test in the future and might provide a mechanistic explanation for why female mice show enhanced wound-healing compared to males [26, 27].

Understanding neutrophil biology has broad implications for therapeutic interventions. Additionally, investigating sex-dimorphic mechanisms affecting neutrophil responses is vital for developing interventions beneficial to both males and females. For example, there is a clear female bias when it comes to rheumatoid arthritis, whereby 75% of patients are women [28]. Inducing arthritis in mice by anti-type II collagen antibodies and lipopolysaccharide, leads to massive neutrophil infiltration into the joint space [29]. Fascinatingly, depleting neutrophils either by the onset of arthritis or during arthritis completely ameliorates the disease [29], suggesting that neutrophils not only initiate but are also involved in maintaining arthritis disease progression. Thus, investigating female-biased processes in neutrophils, including the contribution of the ECM, might be an important next step in managing rheumatoid arthritis.

In summary, we examined the sex-specific gene expression differences of neutrophils. We established that a major difference between male and female neutrophils is the expression of ECM genes. We identified a gene network that might prime ECM gene expression in female neutrophils to potentially accelerate wound healing. Dissecting sex-specific and intrinsic gene expression of neutrophils may significantly impact our understanding to tailor sex-specific therapeutic interventions for wound healing, immune responses, and arthritis.

## Methods

### *Data acquisition*

We obtained published processed bulk RNA-seq differential expression results from young (4 months) and aged (20 months), male and female primary bone marrow neutrophils derived from C57BL/6Nia mice (PRJNA630663; **Figure 1A** upper) [11]. For all analyses below, we used the SVA-normalized count table and DEseq2 analyses results generated in that study, for which the processed files were available online from [https://github.com/BenayounLaboratory/Neutrophil Omics 2020](https://github.com/BenayounLaboratory/Neutrophil_Omics_2020) [11].

We also obtained a processed and annotated Seurat object containing data from a 10xGenomics single-cell RNA-seq dataset of young (3 months) male and female primary bone marrow neutrophils derived from C57BL/6J mice (PRJNA796634; **Figure 1A** lower) [12]. This file was obtained from Figshare (<https://doi.org/10.6084/m9.figshare.19623978>) [12]. R package ‘Seurat’ 4.2.0 was used to load and interact with the annotated single-cell RNA-seq expression dataset.

### *Curated lists of extra-cellular matrix-related terms*

We obtained a manually curated list of gene sets relevant to extra-cellular matrix [ECM] biology [18]. The curated gene sets are also provided in **Supplementary Table S1**.

### *Gene Set Enrichment Analysis (GSEA) of extra-cellular matrix-related terms*

We used the GSEA paradigm to determine whether ECM-related gene sets were differentially regulated as a function of sex or age in bulk RNA-seq of primary neutrophils[30]. For this purpose, we used R package ‘phenotest’ 1.42.0 in R version 4.1.2. The DEseq2 t-statistic for each gene calculated for age- or sex-regulation was used to create the ranked gene list for functional enrichment analysis for both sex and aging [11]. The table output of this analysis is reported in **Supplementary Table S2** and graphically represented in **Figure 1B**.

### *Ucell scoring analysis of extra-cellular matrix-related terms*

To determine whether ECM-related terms were differentially regulated as a function of neutrophil biological sex at the single-cell level, we leveraged the UCell robust single-cell gene signature scoring metric implemented through R package 'UCell' 1.3.1 [31]. Cell-wise UCell scores were computed for each ECM-related gene list and are graphically reported as aggregates by sample of origin in **Figure 1C**. Note that Collagen-related genes were not robustly detected at the single cell level, likely a limitation of the platform, and have an extremely low percentage of cells with detected expression (**Figure 1C**). For analysis of statistical significance, a non-parametric Wilcoxon rank sum test was used to compare the distribution of UCell scores between female and male neutrophils and is reported for each gene set in **Figure 1C**.

#### *Analysis of X-linked gene enrichment in the Salmon module*

The list of mouse X-linked genes was obtained by downloading gene information from ENSEMBL BioMart version 108 (database access 2023/02/02), restricting output based on gene position on chromosome X. This list was further restricted to genes expressed in our bulk neutrophil RNA-seq according to our previous study [11]. The Fisher's exact test was used to determine the significance of the overlap between genes of the Salmon module and expressed X-linked genes, using the list of expressed genes from the bulk RNA-seq as the universe.

#### *Weighted gene co-expression network analysis [WGCNA]*

To investigate what other genes are being co-expressed with the collagens and other ECM-related genes, we used the WGCNA paradigm [32, 33]. We used R package 'WGCNA' 1.71 [33] and the above-mentioned normalized SVA count table as the inputs. The data was preprocessed by removing any genes with inconsistent expression, as recommended by the user manual. A power of 10 was chosen to create the scale-free topology based on the power and scale independence equilibration. The produced topological overlap matrix [TOM] reveals the mean network connectivity of each gene, and genes with similar expression profiles were then classified into different modules. We set the minimum module size to 100. The analyses yield 13 significant modules.

We then performed module-trait analysis using age and sex as the traits to correlate to the modules.

### *Functional enrichment analysis of WGCNA gene modules*

We performed functional enrichment analysis for genes associated with the top sex-biased module, the ‘Salmon’ module ( $p = 2 \times 10^{-10}$ ; **Figure 2A-B**), to unbiasedly determine the top functions differentially regulated in primary neutrophils as a function of sex. We used hypergeometric test to determine overrepresented Gene Ontology [GO] terms and REACTOME Genesets in the Salmon module compared to expressed genes in the bulk neutrophil transcriptome dataset. For this purpose, we took advantage of R package ‘ClusterProfiler’ 4.2.2 [34], with GO annotations derived from Bioconductor annotation package ‘org.Mm.eg.db’ 3.14.0, and with Reactome annotations derived from the ‘Reactome-PA’ 1.38.0 package [35]. Both dotplot and gene concept network results were derived from ClusterProfiler plotting functions.

### **Acknowledgements**

This work was supported by NIA T32 AG052374 predoctoral fellowship to C.J.M., by the Swiss National Science Foundation Funding from the SNF P3 Project 190072 to CYE, NIA R01 AG076433 to B.A.B. and Pew Biomedical Scholar award #00034120 to B.A.B.

### **Author Contributions**

C.Y. E. and B.A.B designed the study. C.J.M. and B.A.B. performed data analyses. All authors contributed to the writing and editing of the manuscript.

### **Data Availability**

The bulk RNA-seq data was previously described in Lu et al., 2021, and sequencing data is accessible through BioProject PRJNA630663. The processed normalized count table and DEseq2 result tables were obtained from Github ([https://github.com/BenayounLaboratory/Neutrophil\\_Omics\\_2020](https://github.com/BenayounLaboratory/Neutrophil_Omics_2020)). The single-cell RNA-seq data was previously described in Kim et al., 2022, and sequencing data is

accessible through BioProject PRJNA796634. The processed annotated Seurat file was obtained from Figshare (<https://doi.org/10.6084/m9.figshare.19623978>).

### **Code Availability**

All code will be made available on the Benayoun lab github ([https://github.com/BenayounLaboratory/Neutrophil\\_ECM](https://github.com/BenayounLaboratory/Neutrophil_ECM)).

### **Competing Interests**

The authors declare no competing interests.

## References

- [1] N.K. Sampathkumar, J.I. Bravo, Y. Chen, P.S. Danthi, E.K. Donahue, R.W. Lai, R. Lu, L.T. Randall, N. Vinson, B.A. Benayoun, Widespread sex dimorphism in aging and age-related diseases, *Hum Genet* 139(3) (2020) 333-356.
- [2] S.L. Klein, K.L. Flanagan, Sex differences in immune responses, *Nat Rev Immunol* 16(10) (2016) 626-38.
- [3] E.J. Marquez, C.H. Chung, R. Marches, R.J. Rossi, D. Nehar-Belaid, A. Eroglu, D.J. Mellert, G.A. Kuchel, J. Banchereau, D. Ucar, Sexual-dimorphism in human immune system aging, *Nat Commun* 11(1) (2020) 751.
- [4] S.T. Gal-Oz, B. Maier, H. Yoshida, K. Seddu, N. Elbaz, C. Czysz, O. Zuk, B.E. Stranger, H. Ner-Gaon, T. Shay, ImmGen report: sexual dimorphism in the immune system transcriptome, *Nat Commun* 10(1) (2019) 4295.
- [5] E.H. Nah, S. Kim, S. Cho, H.I. Cho, Complete Blood Count Reference Intervals and Patterns of Changes Across Pediatric, Adult, and Geriatric Ages in Korea, *Ann Lab Med* 38(6) (2018) 503-511.
- [6] B. Shah, N. Burg, M.H. Pillinger, Chapter 11 - Neutrophils, in: G.S. Firestein, R.C. Budd, S.E. Gabriel, I.B. McInnes, J.R. O'Dell (Eds.), *Kelley and Firestein's Textbook of Rheumatology (Tenth Edition)*, Elsevier 2017, pp. 169-188.e3.
- [7] R.C. Furze, S.M. Rankin, Neutrophil mobilization and clearance in the bone marrow, *Immunology* 125(3) (2008) 281-288.
- [8] G. Sollberger, D.O. Tilley, A. Zychlinsky, Neutrophil Extracellular Traps: The Biology of Chromatin Externalization, *Dev Cell* 44(5) (2018) 542-553.
- [9] O. Soehnlein, S. Steffens, A. Hidalgo, C. Weber, Neutrophils as protagonists and targets in chronic inflammation, *Nat Rev Immunol* 17(4) (2017) 248-261.
- [10] V. Papayannopoulos, Neutrophil extracellular traps in immunity and disease, *Nat Rev Immunol* 18(2) (2018) 134-147.
- [11] R.J. Lu, S. Taylor, K. Contrepolis, M. Kim, J.I. Bravo, M. Ellenberger, N.K. Sampathkumar, B.A. Benayoun, Multi-omic profiling of primary mouse neutrophils predicts a pattern of sex and age-related functional regulation, *Nat Aging* 1(8) (2021) 715-733.

- [12] M. Kim, R.J. Lu, B.A. Benayoun, Single-cell RNA-seq of primary bone marrow neutrophils from female and male adult mice, *Sci Data* 9(1) (2022) 442.
- [13] S.E. McGowan, P.J. Stone, G.L. Snider, C. Franzblau, Alveolar macrophage modulation of proteolysis by neutrophil elastase in extracellular matrix, *Am Rev Respir Dis* 130(5) (1984) 734-9.
- [14] A. Garcia-Garcia, I. Martin, Extracellular Matrices to Modulate the Innate Immune Response and Enhance Bone Healing, *Front Immunol* 10 (2019) 2256.
- [15] Y. Zhu, Y. Huang, Q. Ji, S. Fu, J. Gu, N. Tai, X. Wang, Interplay between Extracellular Matrix and Neutrophils in Diseases, *J Immunol Res* 2021 (2021) 8243378.
- [16] A. Fischer, J. Wannemacher, S. Christ, T. Koopmans, S. Kadri, J. Zhao, M. Gouda, H. Ye, M. Muck-Hausl, P.W. Krenn, H.G. Machens, R. Fassler, P.A. Neumann, S.M. Hauck, Y. Rinkevich, Neutrophils direct preexisting matrix to initiate repair in damaged tissues, *Nat Immunol* 23(4) (2022) 518-531.
- [17] O.W. Bastian, L. Koenderman, J. Alblas, L.P. Leenen, T.J. Blokhuis, Neutrophils contribute to fracture healing by synthesizing fibronectin+ extracellular matrix rapidly after injury, *Clin Immunol* 164 (2016) 78-84.
- [18] A. Naba, K.R. Clauser, H. Ding, C.A. Whittaker, S.A. Carr, R.O. Hynes, The extracellular matrix: Tools and insights for the "omics" era, *Matrix Biol* 49 (2016) 10-24.
- [19] X. Xie, Q. Shi, P. Wu, X. Zhang, H. Kambara, J. Su, H. Yu, S.Y. Park, R. Guo, Q. Ren, S. Zhang, Y. Xu, L.E. Silberstein, T. Cheng, F. Ma, C. Li, H.R. Luo, Single-cell transcriptome profiling reveals neutrophil heterogeneity in homeostasis and infection, *Nat Immunol* 21(9) (2020) 1119-1133.
- [20] A. Chrysanthopoulou, I. Mitroulis, E. Apostolidou, S. Arelaki, D. Mikroulis, T. Konstantinidis, E. Sivridis, M. Koffa, A. Giatromanolaki, D.T. Boumpas, K. Ritis, K. Kambas, Neutrophil extracellular traps promote differentiation and function of fibroblasts, *J Pathol* 233(3) (2014) 294-307.
- [21] A. Curaj, D. Schumacher, M. Rusu, M. Staudt, X. Li, S. Simsekylmaz, V. Jankowski, J. Jankowski, A.R. Dumitrascu, D.J. Hausenloy, A. Schuh, E.A. Liehn, Neutrophils Modulate Fibroblast Function and Promote Healing and Scar Formation after Murine Myocardial Infarction, *Int J Mol Sci* 21(10) (2020).

- [22] D.Y. Tzeng, T.F. Deuel, J.S. Huang, R.M. Senior, L.A. Boxer, R.L. Baehner, Platelet-derived growth factor promotes polymorphonuclear leukocyte activation, *Blood* 64(5) (1984) 1123-8.
- [23] L.M. Pierini, M.A. Lawson, R.J. Eddy, B. Hendey, F.R. Maxfield, Oriented endocytic recycling of alpha5beta1 in motile neutrophils, *Blood* 95(8) (2000) 2471-80.
- [24] J. Patten, K. Wang, Fibronectin in development and wound healing, *Adv Drug Deliv Rev* 170 (2021) 353-368.
- [25] B. Selvarajah, I. Azuelos, M. Plate, D. Guillotin, E.J. Forty, G. Contento, H.V. Woodcock, M. Redding, A. Taylor, G. Brunori, P.F. Durrenberger, R. Ronzoni, A.D. Blanchard, P.F. Mercer, D. Anastasiou, R.C. Chambers, mTORC1 amplifies the ATF4-dependent de novo serine-glycine pathway to supply glycine during TGF-beta(1)-induced collagen biosynthesis, *Sci Signal* 12(582) (2019).
- [26] G.S. Ashcroft, Sex differences in wound healing, *Advances in Molecular and Cell Biology*, Elsevier 2004, pp. 321-328.
- [27] B. Rønø, L.H. Engelholm, L.R. Lund, A. Hald, Gender Affects Skin Wound Healing in Plasminogen Deficient Mice, *PLOS ONE* 8(3) (2013) e59942.
- [28] T. Sokka, S. Toloza, M. Cutolo, H. Kautiainen, H. Makinen, F. Gogus, V. Skakic, H. Badsha, T. Peets, A. Baranauskaite, P. Geher, I. Ujfalussy, F.N. Skopouli, M. Mavrommati, R. Alten, C. Pohl, J. Sibilias, A. Stancati, F. Salaffi, W. Romanowski, D. Zarowny-Wierzbinska, D. Henrohn, B. Bresnihan, P. Minnock, L.S. Knudsen, J.W. Jacobs, J. Calvo-Alen, J. Lazovskis, R. Pinheiro Gda, D. Karateev, D. Andersone, S. Rexhepi, Y. Yazici, T. Pincus, Q.-R. Group, Women, men, and rheumatoid arthritis: analyses of disease activity, disease characteristics, and treatments in the QUEST-RA study, *Arthritis Res Ther* 11(1) (2009) R7.
- [29] D. Tanaka, T. Kagari, H. Doi, T. Shimosato, Essential role of neutrophils in anti-type II collagen antibody and lipopolysaccharide-induced arthritis, *Immunology* 119(2) (2006) 195-202.
- [30] A. Subramanian, P. Tamayo, V.K. Mootha, S. Mukherjee, B.L. Ebert, M.A. Gillette, A. Paulovich, S.L. Pomeroy, T.R. Golub, E.S. Lander, J.P. Mesirov, Gene set enrichment analysis: a knowledge-based approach for interpreting genome-wide expression profiles, *Proc Natl Acad Sci U S A* 102(43) (2005) 15545-50.



- [31] M. Andreatta, S.J. Carmona, UCell: Robust and scalable single-cell gene signature scoring, *Comput Struct Biotechnol J* 19 (2021) 3796-3798.
- [32] T.F. Fuller, A. Ghazalpour, J.E. Aten, T.A. Drake, A.J. Lusis, S. Horvath, Weighted gene coexpression network analysis strategies applied to mouse weight, *Mamm Genome* 18(6-7) (2007) 463-72.
- [33] P. Langfelder, S. Horvath, WGCNA: an R package for weighted correlation network analysis, *BMC Bioinformatics* 9 (2008) 559.
- [34] G. Yu, L.G. Wang, Y. Han, Q.Y. He, clusterProfiler: an R package for comparing biological themes among gene clusters, *OMICS* 16(5) (2012) 284-7.
- [35] G. Yu, Q.Y. He, ReactomePA: an R/Bioconductor package for reactome pathway analysis and visualization, *Mol Biosyst* 12(2) (2016) 477-9.

## Legends to figures:

### **Figure 1. Female neutrophils exhibit higher transcriptional expression of extracellular matrix related genes**

(A) Experimental design of primary neutrophil transcriptomic datasets reanalyzed in this study [11, 12]. (B) Bubble plot showing GSEA enrichment results for ECM-related genes based on sex regulation from neutrophil bulk RNA-seq (all terms are female-biased). See full analysis results in **Supplementary Table S1**. (C) Dotplot of 'Ucell' scores of ECM-related genesets aggregated by sample of origin in single cell neutrophil RNA-seq dataset from [12]. For each geneset, statistical significance in a non-parametric Wilcoxon rank sum test between the distribution of UCell scores between female and male neutrophils is reported. (D) GSEA plot of collagen genes from neutrophil bulk RNA-seq (FDR < 1e-8, indicative of female neutrophil expression bias). (E) Heatmap displaying the expression of collagen genes (gene set identical as in C) from the bulk neutrophil RNA-seq.

### **Figure 2. WGCNA reveals that the top female-biased expression module is enriched for collagen and ECM-related genes.**

(A) Module-trait relationships from neutrophil bulk RNA-seq WGCNA. Note that the Salmon module (bold) is the most biased for female neutrophils. Also see **Figure S1** and **Supplementary Table S3**. (B) Heatmap of sample-wise module eigengenes from bulk neutrophil RNA-seq WGCNA analysis. (C) Dotplot of significantly enriched gene sets associated to the Salmon module, using hypergeometric enrichment analysis with Gene Ontology [GO] terms (FDR < 0.05). Also see full results in **Supplementary Table S3**. (D) Gene Concept network for GO enrichment analysis related to the Salmon cluster, derived from the same analysis as (C).

## **Legends to Supplementary figures:**

### **Supplemental Figure S1. Expression of ECM-related genesets in single-cell RNA as a function of neutrophil subsets.**

(A) Dotplot of 'Ucell' scores of ECM-related genesets aggregated by neutrophil maturation subset (as defined by [19]) in single-cell neutrophil RNA-seq dataset from [12].

### **Supplemental Figure S2. WGCNA module cluster dendrogram and salmon module expression profile.**

(A) WGCNA module cluster dendrogram from bulk neutrophil RNA-seq. (B) Heatmap of WGCNA Salmon module gene expression from bulk neutrophil RNA-seq.

**Inventory of Supplementary tables:**

**Supplementary Table S1:** Curated Gene Lists for ECM-related genes.

**Supplementary Table S2:** GSEA results for ECM-related gene lists on bulk neutrophil RNA-seq, as a function of sex and age. Note that no ECM gene set passed significance thresholds for age-related regulation.

**Supplementary Table S3:** WGCNA related analysis with module membership, and Gene Ontology and Reactome hypergeometric enrichment analysis of Salmon and magenta modules.

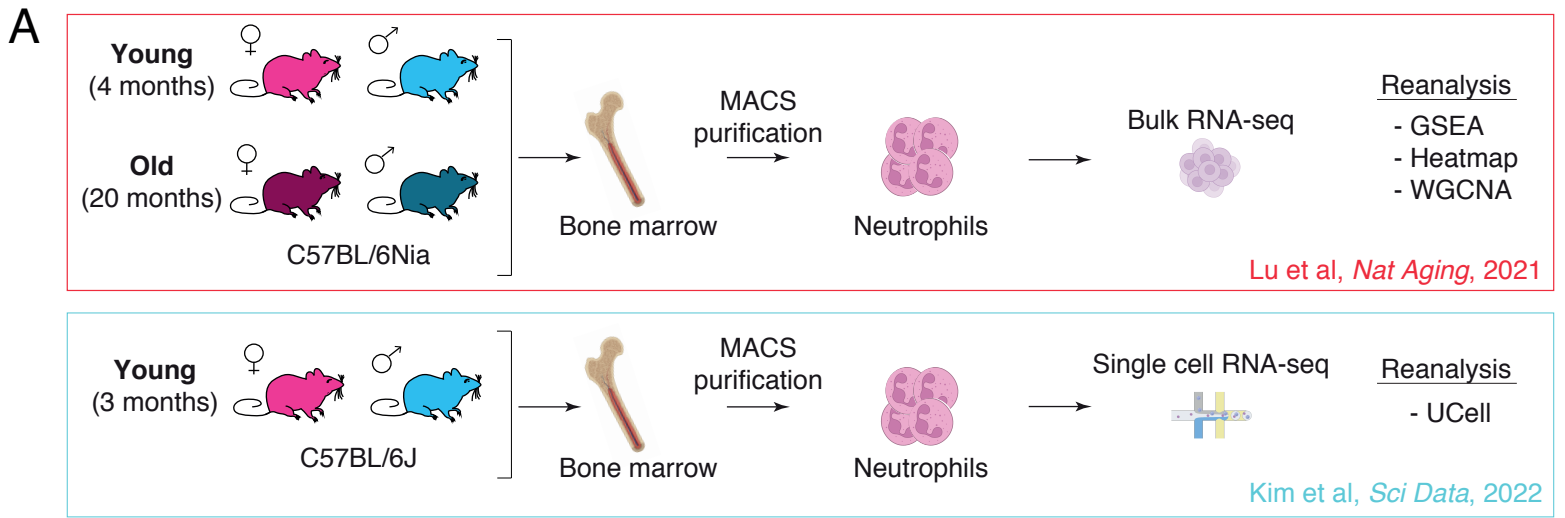

**B** GSEA of ECM-related genes as a function of sex (bulk)

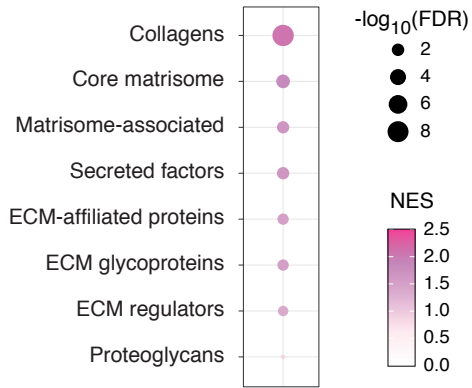

**C** Ucell analysis of ECM-related genes as a function of sex (single cell)

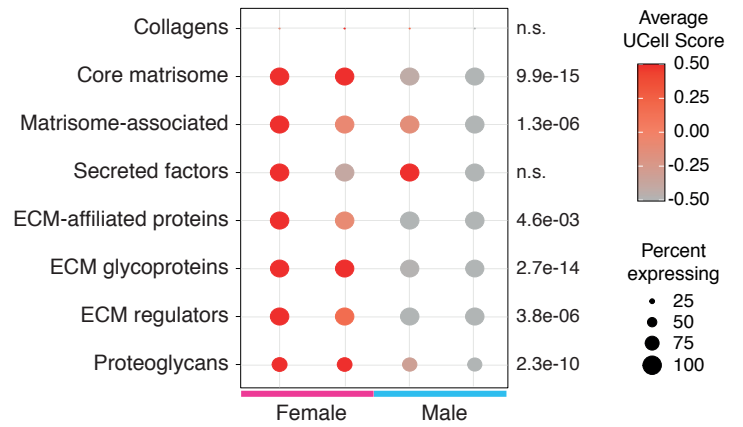

**D** GSEA plot of collagen genes as a function of sex (bulk)

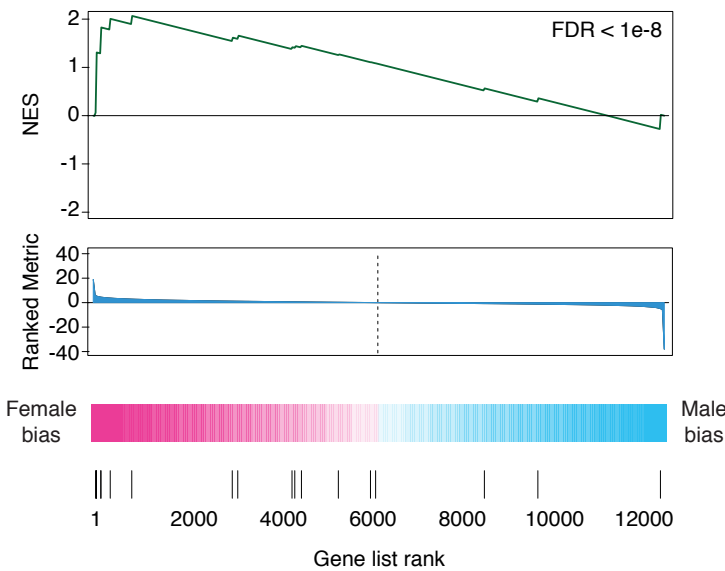

**E** Heatmap of collagen gene expression (bulk)

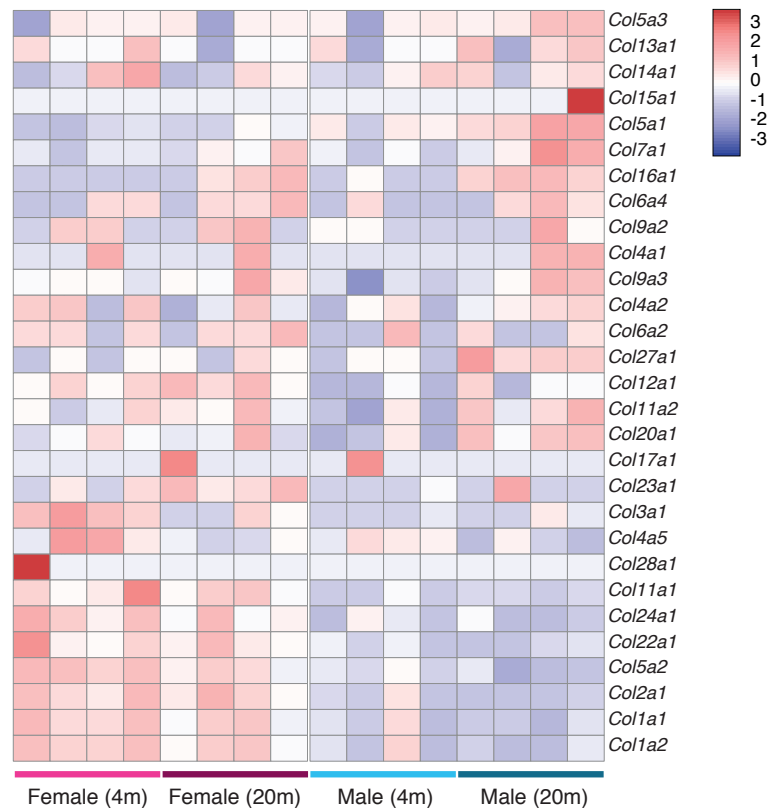

### A Module-trait relationships from WGCNA (bulk)

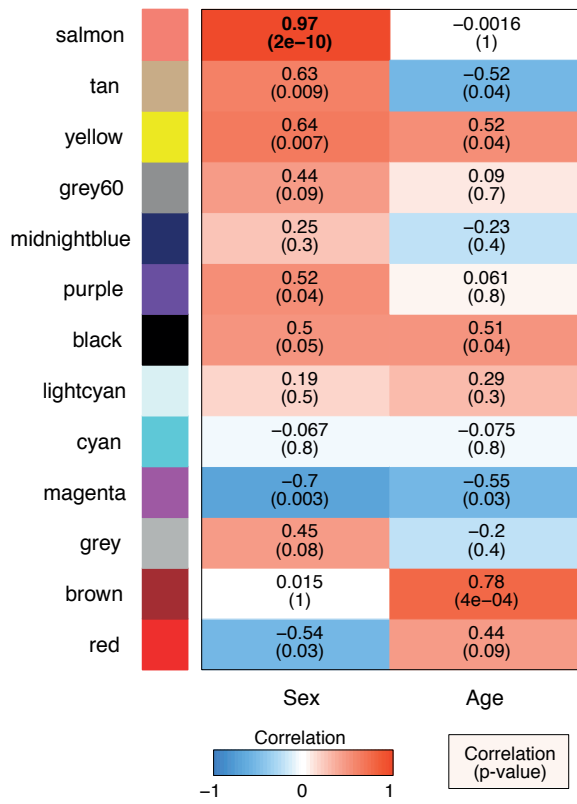

### B Heatmap of module eigengenes by sample from WGCNA (bulk)

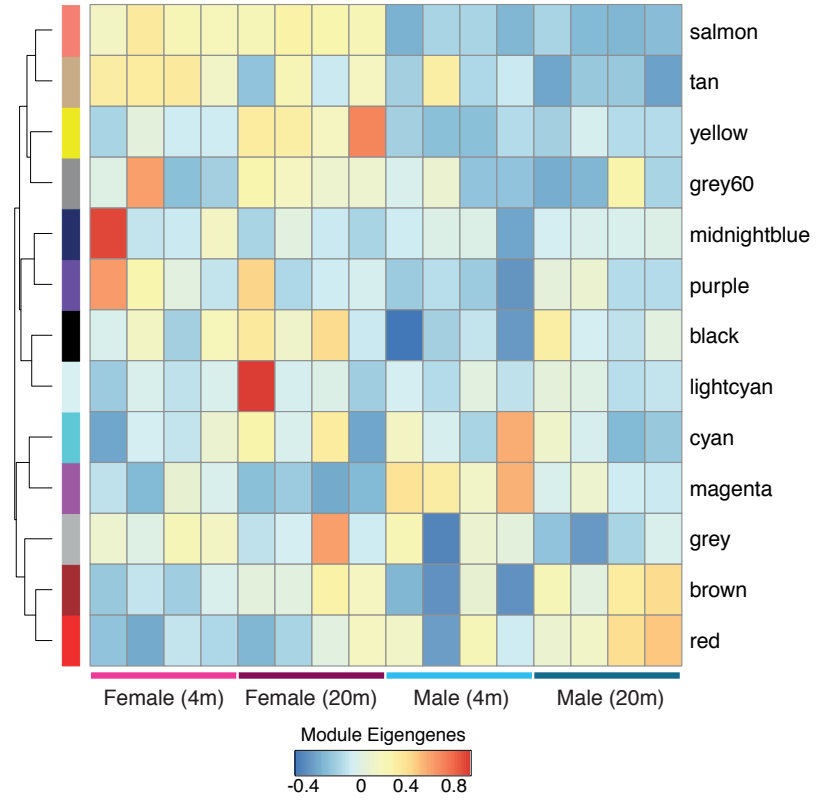

### C Salmon cluster hypergeometric enrichments (Gene Ontology)

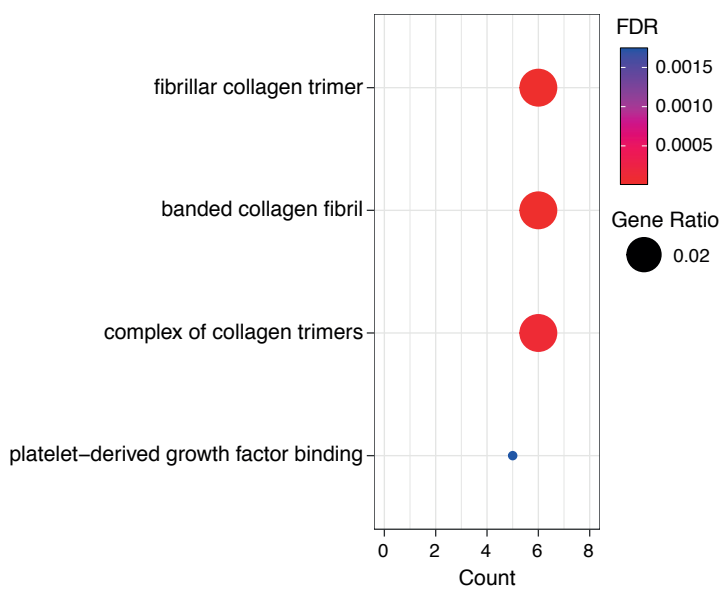

### D Salmon cluster gene-concept network (Gene Ontology)

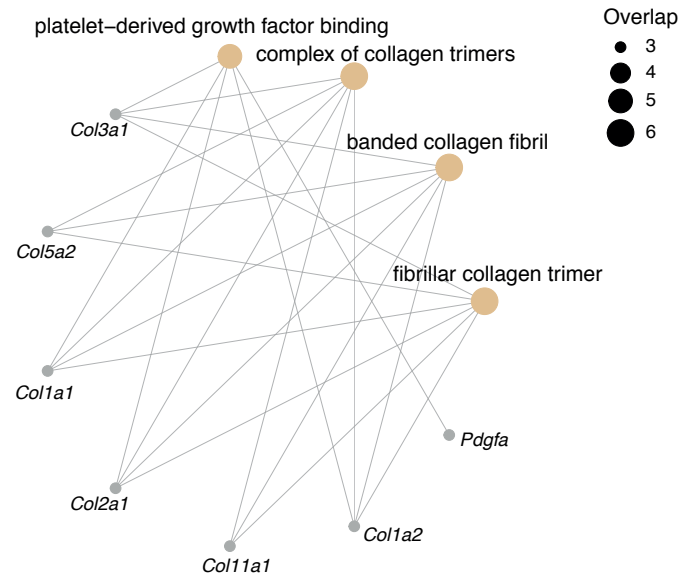

Source: https://www.biorxiv.org/content/10.1101/2023.02.25.530027v1.full.pdf
